# Supplementary material for: Customizing PBE exchange–correlation functionals: a comprehensive approach for band gap prediction in diverse semiconductors
Source: Royal Society of Chemistry journal article supplement (doi:10.1039/d4cp03260h), 2024-01-01
Supplement: d4cp03260h1.pdf [file d4cp03260h1.pdf]

## Supplemental material of Customizing PBE Exchange-Correlation functionals: A comprehensive approach for band gap prediction in diverse semiconductors

Satadeep Bhattacharjee,<sup>1,\*</sup> Namitha Anna Koshi,<sup>1</sup> and Seung-Cheol Lee<sup>2</sup>

<sup>1</sup>Indo-Korea Science and Technology Center (IKST), Bangalore, India

<sup>2</sup>Electronic Materials Research Center, Korea Institute of Science & Technology, Korea

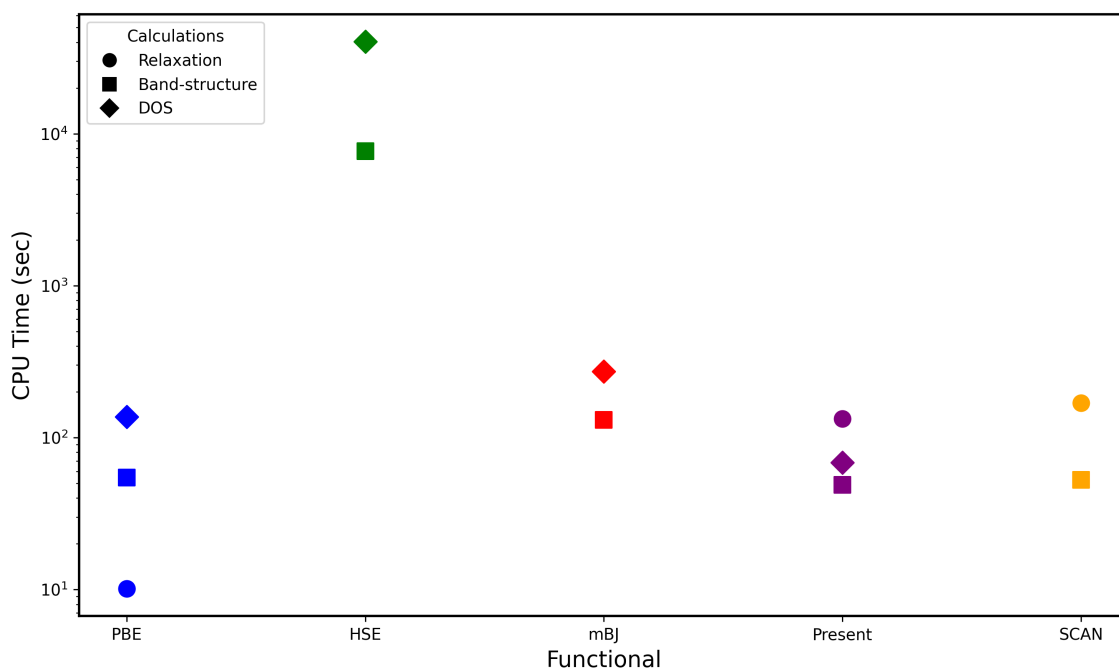

FIG. 1. Logarithmic comparison of CPU times for ZnS (Wurtzite Structure) across various functionals (PBE, HSE, mBJ, SCAN, and Present functional). The calculations include structural relaxation ("Relaxation"), band-structure ("Band-structure"), and Density of States ("DOS").

\* s.bhattacharjee@ikst.res.in
